# Supplementary material for: Synthesis, molecular docking calculation, fluorescence and bioimaging of mitochondria-targeted ratiometric fluorescent probes for sensing hypochlorite in vivo
Source: Royal Society of Chemistry journal article supplement (doi:10.1039/d0tb02735a), 2021-01-01
Supplement: d0tb02735a2.pdf [file d0tb02735a2.pdf]

*Supporting Information for*

**Synthesis, molecular docking calculation, fluorescence and  
bioimaging of mitochondria-targeted ratiometric fluorescent  
probe for sensing hypochlorite *in vivo***

Ling Huang <sup>a</sup>, Wanting Su <sup>a</sup>, Yuping Zhao <sup>a</sup>, Jingting Zhan <sup>a</sup>, Weiyong Lin <sup>a\*</sup>

<sup>a</sup> Guangxi Key Laboratory of Electrochemical Energy Materials, Institute of Optical Materials and Chemical Biology, School of Chemistry and Chemical Engineering, Guangxi University, Nanning, Guangxi 530004, P. R. China

E-mail: [weiyonglin2013@163.com](mailto:weiyonglin2013@163.com)

## Table of contents

|                                                                                    | Page   |
|------------------------------------------------------------------------------------|--------|
| 1. Materials and methods .....                                                     | S3     |
| 2. The synthesis of <b>Mi-OCI-RP</b> .....                                         | S3     |
| 3. Cell culture and cytotoxicity assays.....                                       | S4     |
| Table S1 Some mitochondria-targeted OCI <sup>-</sup> -sensitive probes .....       | S5     |
| Fig. S1 Binding site and modeling of <b>Mi-OCI-RP</b> and the protease (ANT) ..... | S6     |
| Fig. S2 Linear relationship.....                                                   | S7     |
| Fig. S3 Fluorescence spectra of various relevant species .....                     | S7     |
| Fig. S4-5 Fluorescence spectral stability .....                                    | S8     |
| Fig. S6 pH dependency .....                                                        | S8     |
| Fig. S7 Cytotoxicity of living cells .....                                         | S9     |
| Fig. S8 Fluorescence images of MCF-7 cells .....                                   | S9     |
| Fig. S9-14 NMR and HRMS of compounds .....                                         | S10-12 |
| References.....                                                                    | S13    |

## 1. Materials and methods

All reagents were obtained from commercial suppliers without further purification. All experiments used ultra-pure water. Solvents were purified by standard methods prior. Ultra-pure water is using by ULPURE. The pH measurements were performed with PHS-3E pH meter. UV-vis absorption spectra were obtained on a Shimadzu UV-2700 spectrophotometer, and fluorescence spectra were measured on a HITACHI F4700 fluorescence spectrophotometer. The fluorescence imaging of cells was performed with a Leica TCS SP8 CARS confocal microscope. CCK-8 was purchased from Fluorescence imaging experiments were performed with TransGen Biotechnology. TLC analysis was carried out on silica gel plates, and column chromatography was conducted over silica gel (mesh 200-300); both of them were purchased from the Qingdao Ocean Chemicals.  $^1\text{H}$  and  $^{13}\text{C}$  NMR spectra were measured on a Varian Unity 600 spectrometer. High resolution mass spectrometric (HRMS) analyses were measured on Brooke solanX 70 FT-MS, Agilent 6540T.

## 2. The synthesis of the probe Mi-OCl-RP

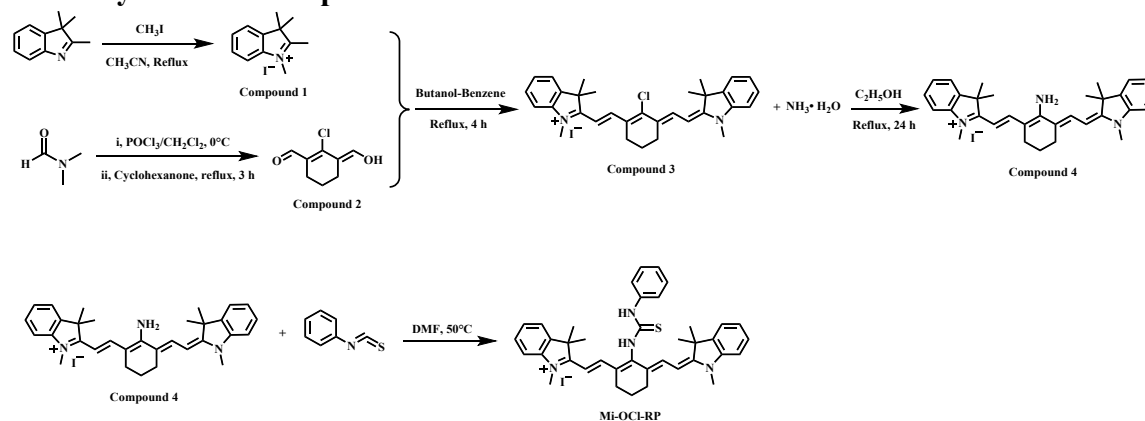

**Scheme S1.** The synthetic route of **Mi-OCl-RP**.

Compounds **1**, **2** and **3** were prepared by the literature procedure.<sup>1</sup> Synthesis of other compounds are described below.

**Synthesis of compound 4.** Compound **3** (100 mg, 0.16 mmol) was dissolved in  $\text{C}_2\text{H}_5\text{OH}$  (20 mL). Then the solution was added slowly into the ammonium hydroxide. The mixture solution was then stirred at  $85^\circ\text{C}$  for 24 h. After cool to room temperature, the residue was purified by silica chromatography using  $\text{CH}_2\text{Cl}_2/\text{PE}$  (10:1, V/V) as the eluent, and compound **4** was obtained as dark red solid (48 mg, 50%).  $^1\text{H}$  NMR (600 MHz,  $\text{CDCl}_3$ )  $\delta$  10.29 (s, 1H), 7.86 (d,  $J = 12.8$  Hz, 1H), 7.27–7.21 (m, 3H), 7.20–7.15 (m, 1H), 6.97 (t,  $J = 7.4$  Hz, 1H), 6.75 (d,  $J = 7.9$  Hz, 1H), 5.56–5.46 (m, 1H), 5.32 (s, 1H), 3.30–3.19 (m, 4H), 2.63–2.60 (m, 2H), 2.56 (s, 1H), 2.52 (d,  $J = 6.1$  Hz, 2H), 1.96–1.87 (m, 1H), 1.83 (d,  $J = 3.7$  Hz, 2H), 1.80 (dd,  $J = 12.4, 6.2$  Hz, 2H), 1.75 (d,  $J = 7.3$  Hz, 2H), 1.69 (s, 5H), 1.33–1.26 (m, 1H), 0.91 (t,  $J = 6.9$  Hz, 1H).  $^{13}\text{C}$  NMR (151 MHz,  $\text{CDCl}_3$ )  $\delta$  190.85 (s), 162.92 (s), 148.70 (s), 144.45 (s), 139.20 (s), 131.15 (s), 128.65 (s), 127.90 (s), 127.64 (s), 127.61 (s), 125.72 (s), 123.34 (s), 121.77 (s), 121.65 (s), 120.89 (s), 119.33 (s), 117.78 (s), 106.78 (s), 105.64 (s), 92.93 (s), 92.50 (s), 53.45 (s), 46.44 (s), 45.67 (s), 44.79 (s), 29.41 (s), 28.32 (s), 26.70 (d), 24.61 (s), 20.95 (d). Anal. Calcd for  $\text{C}_{32}\text{H}_{38}\text{IN}_3$ : 591.58. Found: ESI-MS  $m/z$  ( $[\text{C}_{32}\text{H}_{38}\text{IN}_3] + \text{H}$ ) $^+$ : 592.2372; ( $[\text{C}_{32}\text{H}_{38}\text{IN}_3] + \text{Na}$ ) $^+$ : 614.2021.

**Synthesis of the Probe Mi-OCI-RP.** Compound **4** (50 mg, 0.084 mmol) was dissolved in DMF (5 mL). Then the solution was added slowly into the phenyl isothiocyanate. The mixture solution was then stirred at 50 °C for 24 h. After cooling to room temperature, the residue was purified by silica chromatography using CH<sub>2</sub>Cl<sub>2</sub>/MeOH (10:1, V/V) as the eluent, and the probe **Mi-OCI-RP** was obtained as dark red solid (15 mg, 24%). <sup>1</sup>H NMR (600 MHz, CDCl<sub>3</sub>) δ 10.66 (d, *J* = 11.9 Hz, 1H), 7.89 (s, 1H), 7.80 (d, *J* = 11.4 Hz, 1H), 7.57 (d, *J* = 5.3 Hz, 3H), 7.47 (d, *J* = 7.5 Hz, 2H), 7.42 (d, *J* = 7.2 Hz, 2H), 7.35 (s, 3H), 7.24 (d, *J* = 7.4 Hz, 1H), 7.16 (s, 1H), 7.12 (s, 1H), 7.03 (dd, *J* = 16.1, 8.8 Hz, 2H), 4.09 (s, 3H), 2.97 (s, 2H), 2.76 (s, 2H), 1.89 (s, 2H), 1.79 (d, *J* = 16.7 Hz, 6H), 1.27 (s, 6H), 0.89 (s, 3H). <sup>13</sup>C NMR (151 MHz, CDCl<sub>3</sub>) δ 167.72 (s), 164.25 (d, *J* = 3.1 Hz), 142.83 (s), 141.04 (s), 140.40 (s), 140.07 (s), 138.79 (s), 136.86 (s), 135.41 (s), 129.57 (s), 129.40 (s), 129.18 (d, *J* = 5.0 Hz), 127.33 (s), 126.50 (s), 126.14 (s), 125.75 (s), 123.76 (s), 123.06 (s), 122.27 (s), 120.02 (s), 118.29 (s), 117.59 (s), 116.34 (s), 115.17 (s), 111.75 (s), 109.97 (s), 100.00 (s), 92.17 (s), 51.96 (s), 35.70 (s), 31.93 (s), 31.66 (s), 31.43 (s), 29.70 (s), 29.37 (s), 28.25 (s), 25.79 (s), 24.75 (s), 22.70 (s), 21.68 (s). Anal. Calcd for C<sub>39</sub>H<sub>43</sub>IN<sub>4</sub>S: 726.77. Found: ESI-MS *m/z* ([C<sub>39</sub>H<sub>43</sub>IN<sub>4</sub>S] + H)<sup>+</sup>: 727.2386.

### 3. Cell culture and cytotoxicity assays

A549 cells, MCF-7 cells and RAW264.7 were cultured in DMEM or 1640 (Dulbecco's modified Eagle's medium or Roswell Park Memorial Institute medium) supplemented with 10% FBS (fetal bovine serum) in an atmosphere of 5% CO<sub>2</sub> and 95% air at 37 °C. In vitro cytotoxicity was measured using CCK-8 assay on A549 cells, MCF-7 cells and RAW264.7. These Cells were seeded into a 96-well tissue culture plate in the presence of completed Dulbecco's modified Eagle's medium (DMEM) or Roswell Park Memorial Institute medium (1640) supplemented with 10% fetal bovine serum (FBS) and 1% penicillin/streptomycin at 37 °C and 5% CO<sub>2</sub> atmosphere overnight followed by incubation for 24 h in the presence of **Mi-OCI-RP** at different concentrations (5, 10, 20, 30, 40 μM). A commercial cell counting kit-8 (CCK-8) (TransGen Biotechnology, China) was used to detecting the cell viability and the assay was run following the manufactures' instructions. The cell viability was determined by assuming 100% cell viability for cells without **Mi-OCI-RP**.

**Table S1** Literature on mitochondria-targeted OCl<sup>-</sup>-sensitive probes and our probe.

| Reagents                                                                            | Molecular calculation | Response time | Stokes shift | Ratio imaging | Reference |
|-------------------------------------------------------------------------------------|-----------------------|---------------|--------------|---------------|-----------|
| 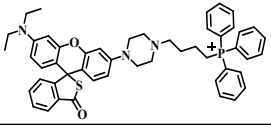   | No                    | -             | 27 nm        | No            | 2         |
|    | No                    | -             | 104 nm       | No            | 3         |
|    | No                    | < 3 min       | 122 nm       | No            | 4         |
|    | No                    | < 10 s        | 15 nm        | No            | 5         |
|   | No                    | < 5 s         | 72 nm        | No            | 6         |
|  | No                    | < 3 min       | 200 nm       | No            | 7         |
|  | No                    | 1 min         | 45 nm        | No            | 8         |
|  | No                    | ≤ 8 s         | 52 nm        | No            | 9         |
|  | No                    | 120 s         | 230 nm       | Yes           | 10        |
|  | No                    | < 40 s        | 209 nm       | Yes           | 11        |
|  | Yes                   | < 7 s         | 278 nm       | Yes           | This work |

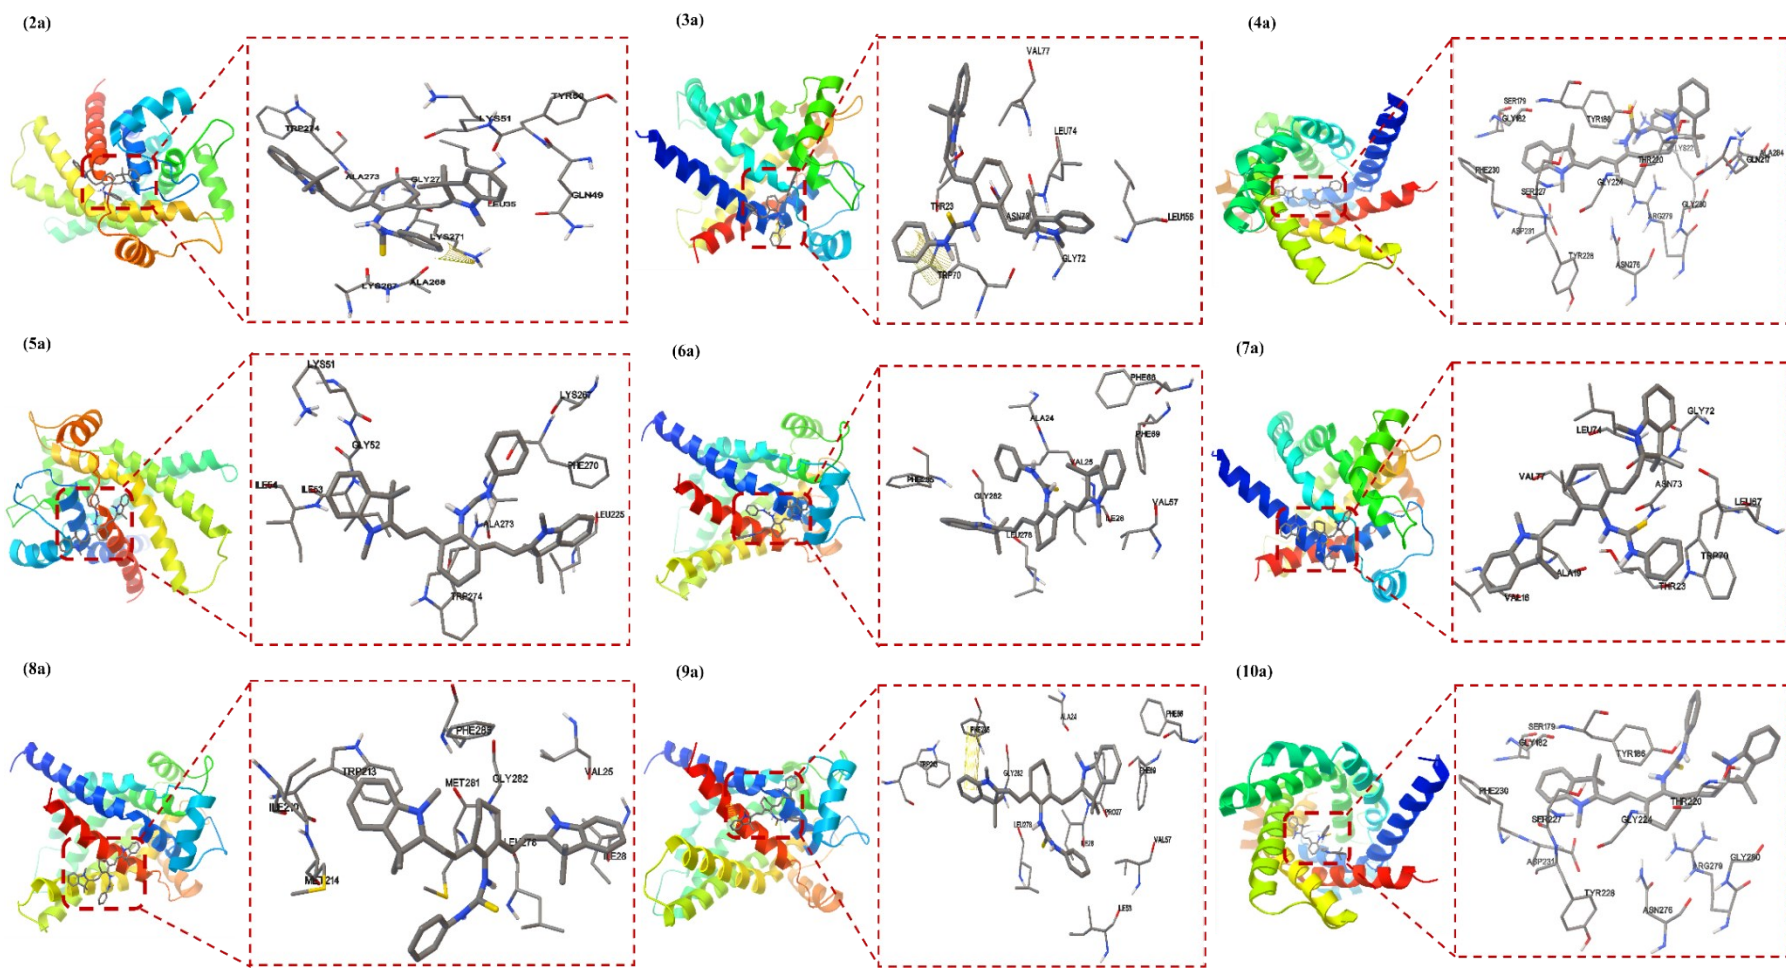

**Figure S1** Molecular binding modeling of conformation 2-10. Tertiary structure of ANT, active site and residues of (2a-10a). The  $\pi$ -cation and  $\pi$ - $\pi$  interactions are indicated by golden blocks.

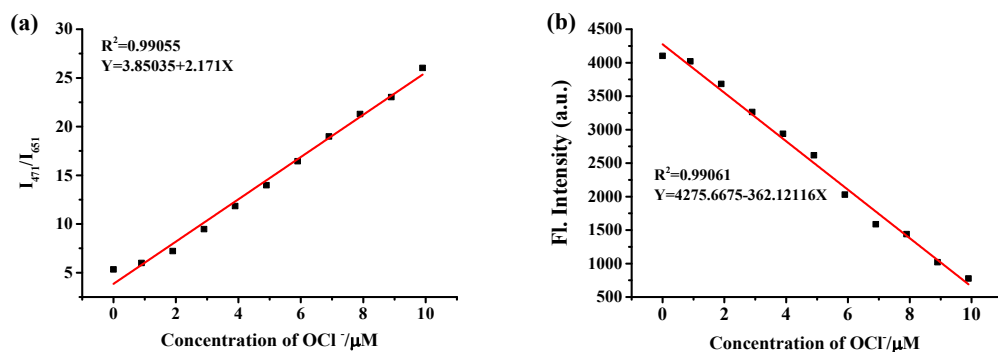

**Figure S2** Linear relationship of fluorescence intensity of **Mi-OCl-RP** in different concentration of  $OCl^-$  (0-10  $\mu M$ ) (a:  $\lambda_{ex} = 373$  nm; b:  $\lambda_{ex} = 588$  nm).

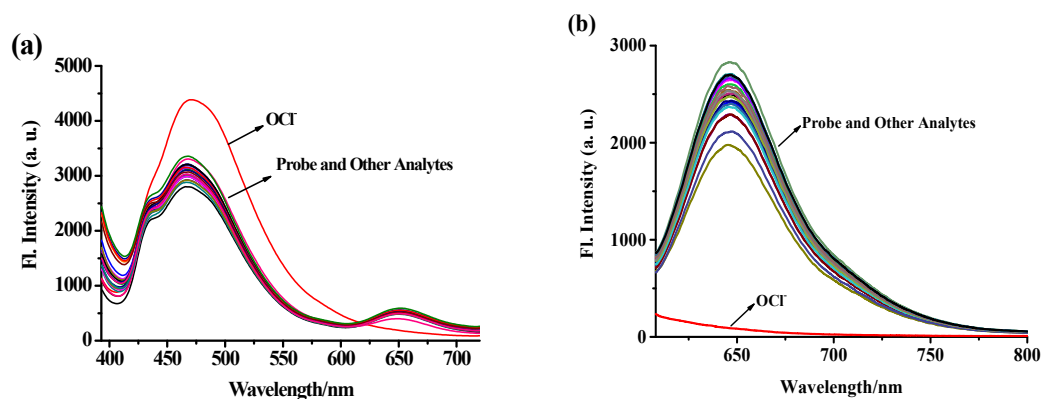

**Figure S3** Fluorescence intensity of **Mi-OCl-RP** (10  $\mu M$ ) with  $OCl^-$  and various relevant species (10  $\mu M$ ): Hydroxyl radicals; Cys; Hcy; Glutathione;  $CH_3COOOH$ ;  $H_2O_2$ ; t-butylhydroperoxide; NO;  $Ca^{2+}$ ;  $Zn^{2+}$ ;  $Co^{2+}$ ;  $Cu^{2+}$ ;  $Fe^{2+}$ ;  $Mg^{2+}$ ;  $F^-$ ;  $Cl^-$ ;  $Br^-$ ;  $I^-$ ;  $HCO_3^-$ ;  $SO_3^{2-}$ ;  $HSO_3^-$ ; and  $NO_2^-$  in pH 7.4 PBS buffer (a:  $\lambda_{ex} = 373$  nm; b:  $\lambda_{ex} = 588$  nm).

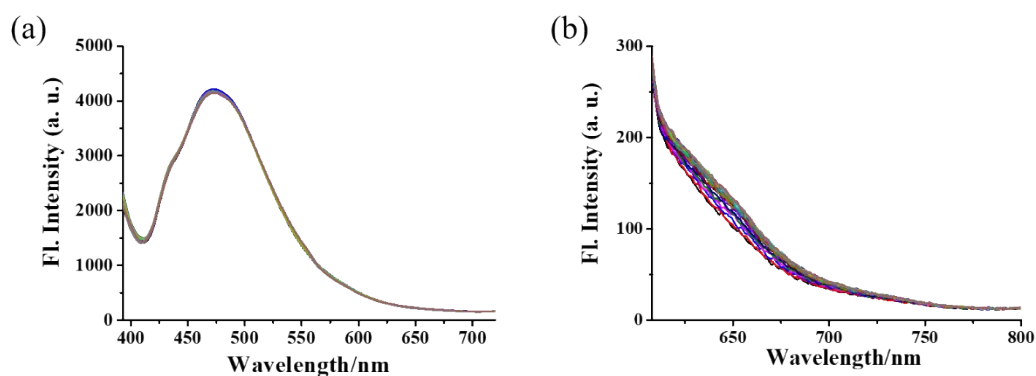

**Figure S4** Fluorescence spectra stability of 10  $\mu\text{M}$  Mi-OCI-RP in pH 7.4 PBS buffer (a:  $\lambda_{\text{ex}} = 373$  nm; b:  $\lambda_{\text{ex}} = 588$  nm).

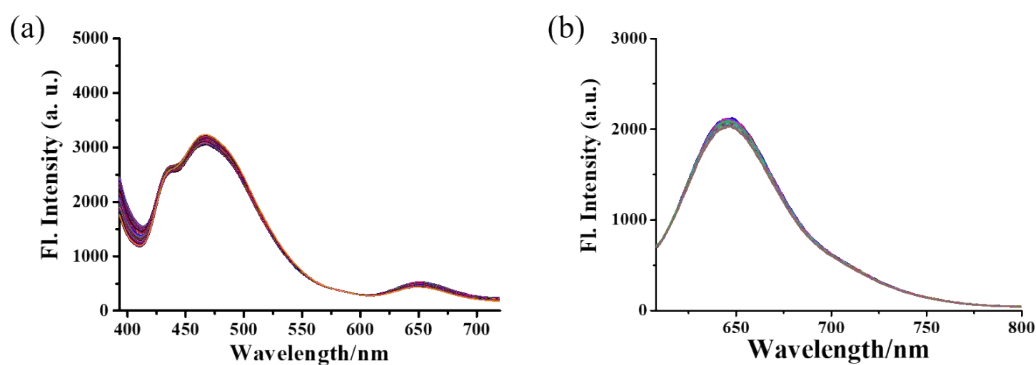

**Figure S5** Fluorescence spectra stability of 10  $\mu\text{M}$  Mi-OCI-RP in the presence of  $\text{OCI}^-$  (10  $\mu\text{M}$ ) in pH 7.4 PBS buffer (a:  $\lambda_{\text{ex}} = 373$  nm; b:  $\lambda_{\text{ex}} = 588$  nm).

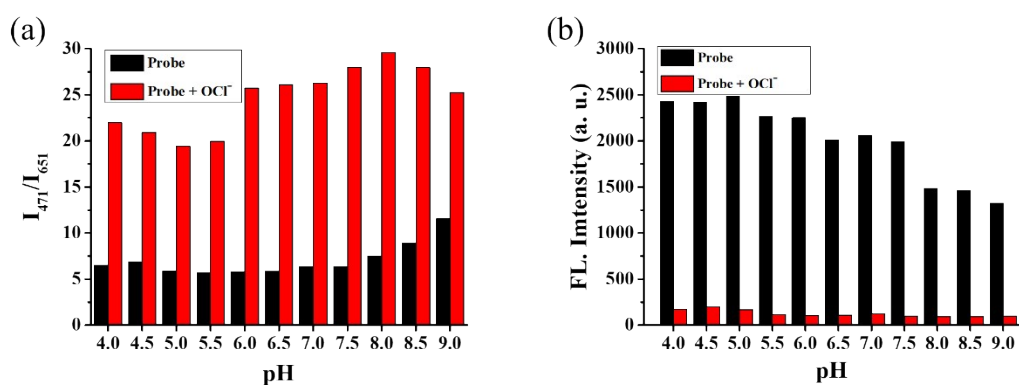

**Figure S6** pH dependency of Mi-OCI-RP (10  $\mu\text{M}$ ) in the absence or presence of  $\text{OCI}^-$  (10  $\mu\text{M}$ ) in PBS buffer (a:  $\lambda_{\text{ex}} = 373$  nm; b:  $\lambda_{\text{ex}} = 588$  nm).



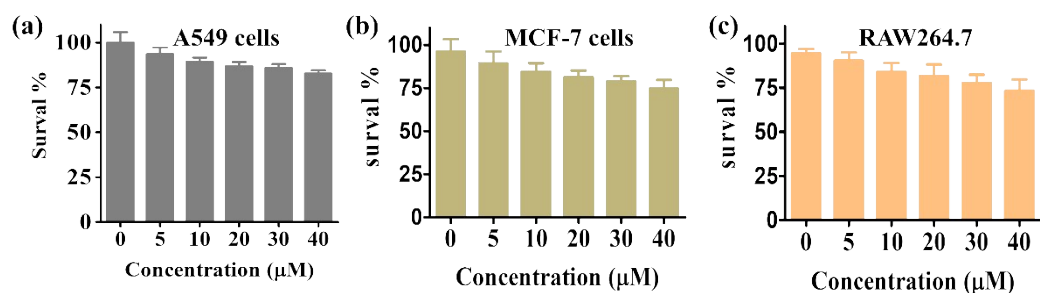

**Figure S7** Cytotoxicity of A549 cells, MCF-7 cells and RAW264.7 measured CCK-8 assay after treatment with different concentrations of Mi-OCI-RP.

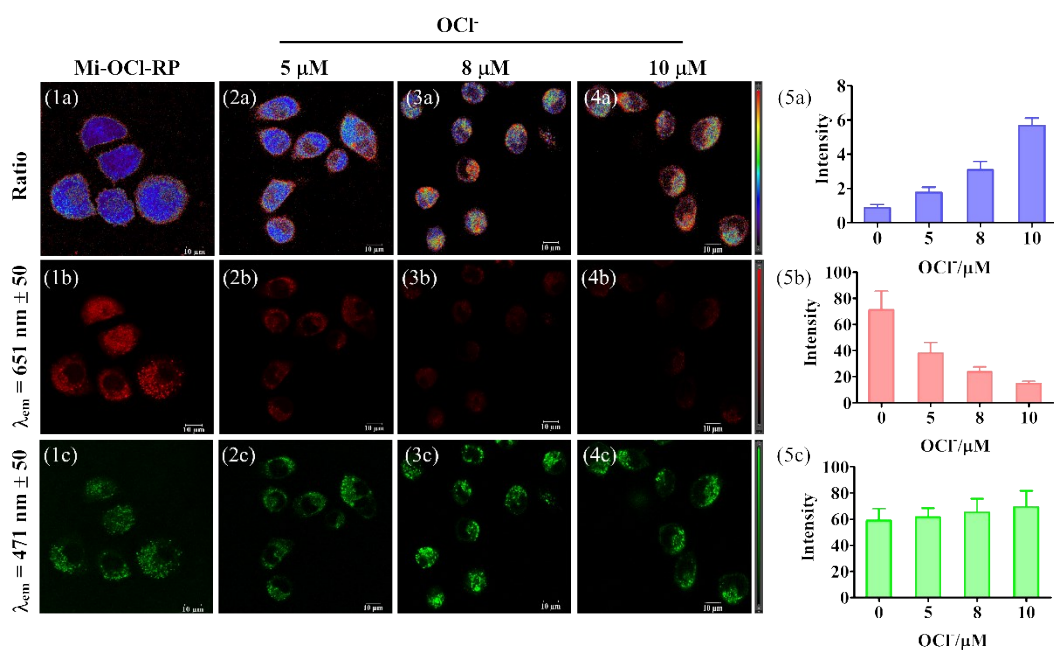

**Figure S8** Confocal fluorescence images of Mi-OCI-RP responding to OCI<sup>-</sup> in MCF-7 cells. (1a-1c) MCF-7 cells incubated with Mi-OCI-RP (10 μM, 20 min); (2a-4c) MCF-7 cells incubated with OCI<sup>-</sup> (5, 8 and 10 μM) for 10 min and then incubated with Mi-OCI-RP (10 μM, 20 min). First column: ratios images of excitation at 405 and 588 nm; second column: excitation at 588 nm; third column: excitation at 405 nm. (5a-5c) Quantified relative fluorescence intensity of images 1a-4c. Scale bar: 10 μm.

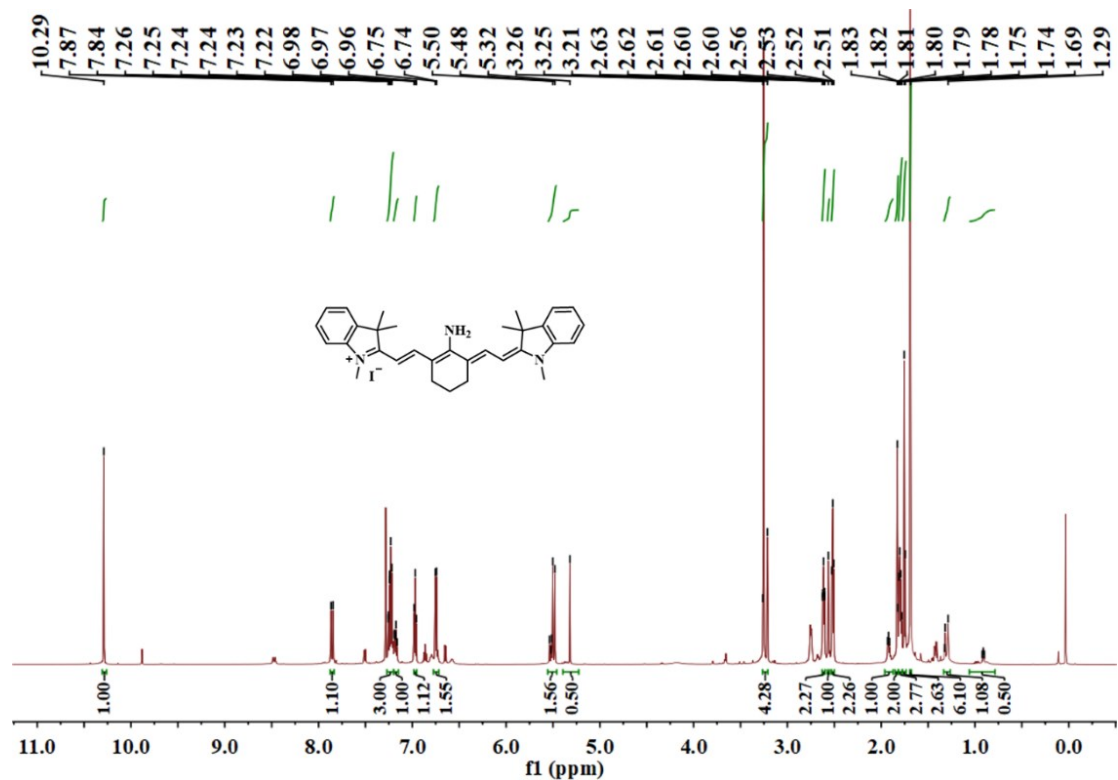

Figure S9  $^1\text{H}$  NMR spectra of compound 2 in  $\text{CDCl}_3$ .

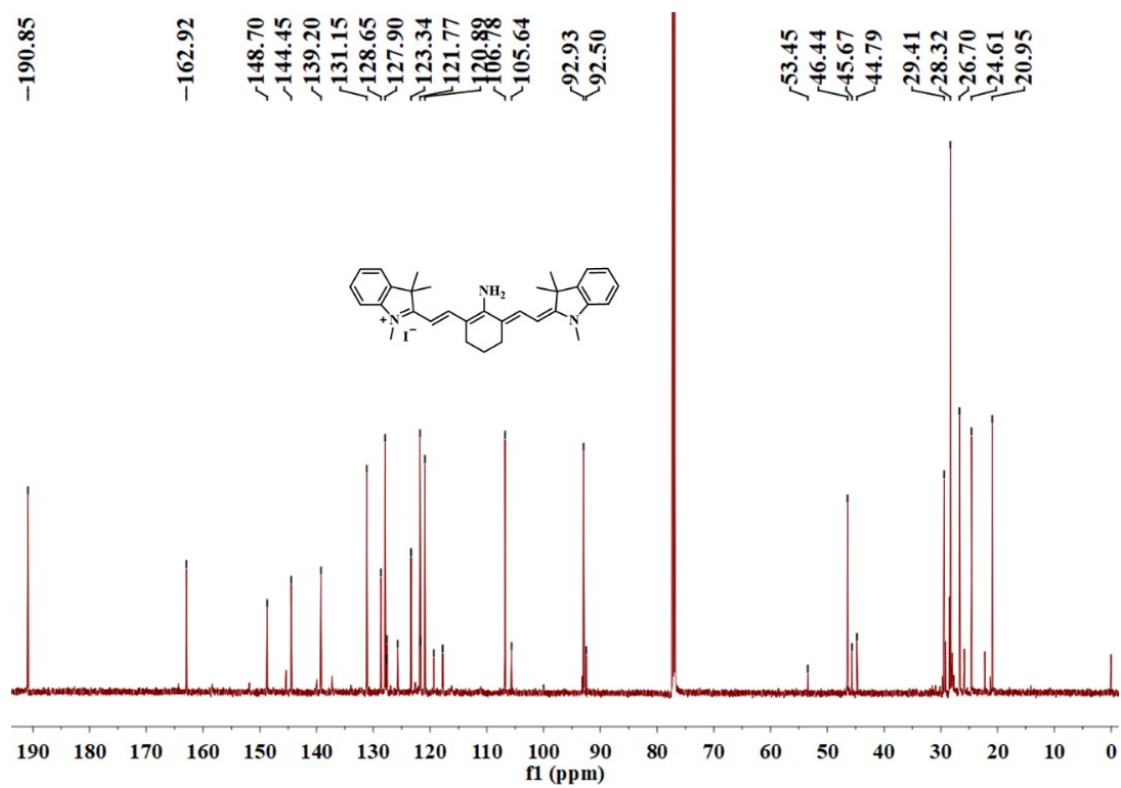

Figure S10  $^{13}\text{C}$  NMR spectra of compound 2 in  $\text{CDCl}_3$ .

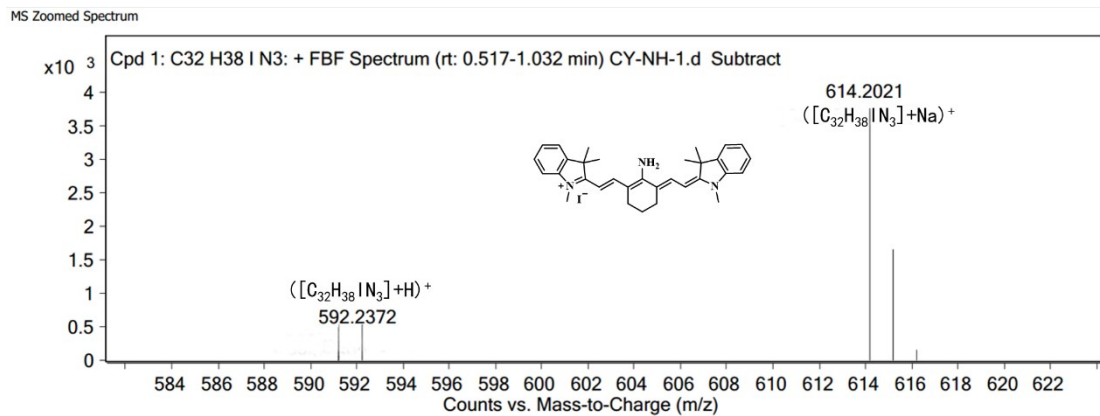

**Figure S11** HRMS of compound **2**.

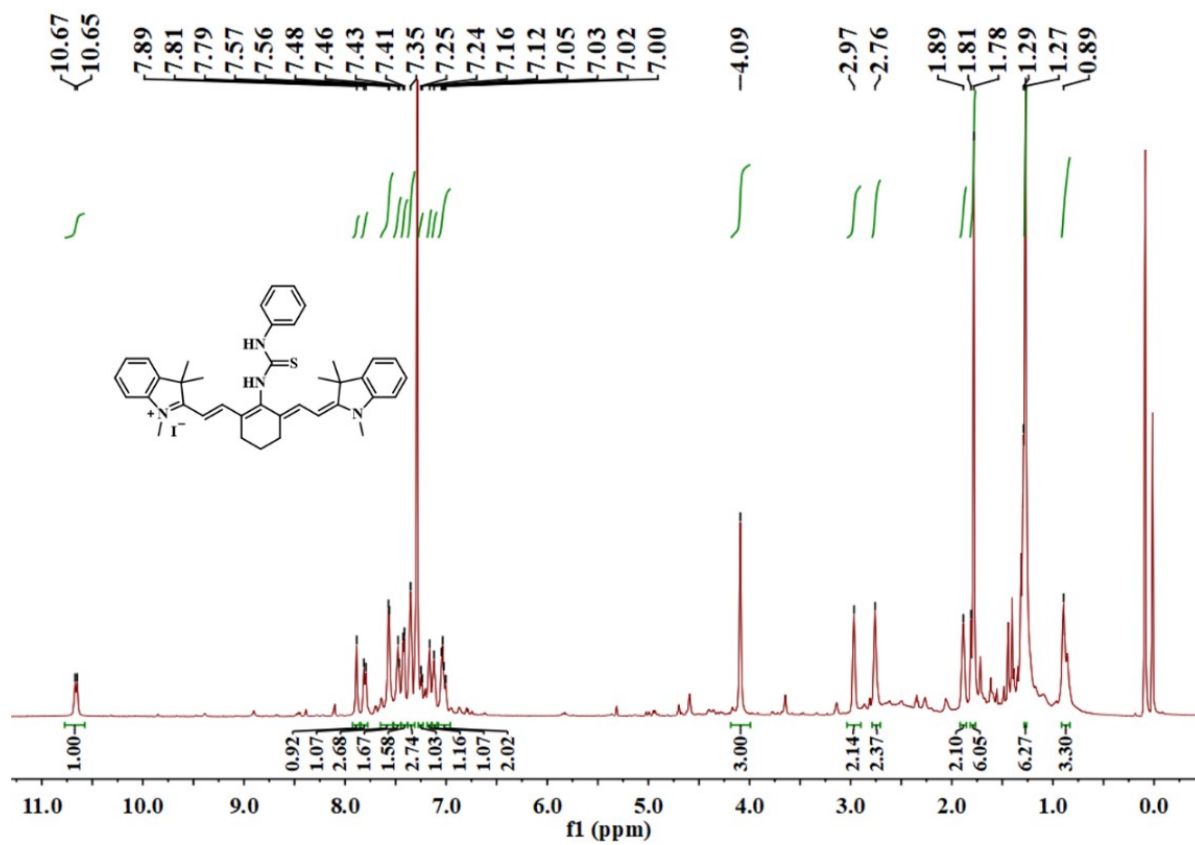

**Figure S12** <sup>1</sup>H NMR spectra of Mi-OCI-RP in CDCl<sub>3</sub>.



## References

1. D. L. Gallaher Jr. and M. E. Johnson, *Analyst*, 1999, **124**, 1541–1546.
2. J. Zhou, L. Li, W. Shi, X. Gao, X. Li and H. Ma, *Chem. Sci.* 2015, **6**, 4884–4888.
3. D. Li, Y. Feng, J. Lin, M. Chen, S. Wang, X. Wang, H. Sheng, Z. Shao, M. Zhu and X. Meng, *Sensors and Actuators B-Chem.* 2016, **222**, 483–491.
4. Q. Xu, C. H. Heo, J. A. Kim, H. S. Lee, Y. Hu, D. mKim, K. M. K. Swamy, G. Kim, S. J. Nam, H. M. Kim and J. Yoon, *Anal. Chem.* 2016, **88**, 6615–6620.
5. K. Li, J. Hou, J. Yang and X. Yu, *Chem. Commun.* 2017, **53**, 5539–5541.
6. B. Zhu, L. Wu, M. Zhang, Y. Wang, C. Liu, Z. Wang, Q. Duan and Pan. Jia, *Biosens. Bioelectorn.* 2018, **107**, 218–223.
7. H. Niu, K. Chen, J. Xu, X. Zhu, W. Cao, Z. Wang, Y. Ye and Y. Zhao, *Sensor. Actuat. B-Chem.* 2019, **29**, 126938.
8. G. Mao, G. Gao, Z. Liang, Y. Wang, L. Su, Z. Wang, H. Zhang, Q. Ma and G. Zhang, *Anal Chim. Acta* 2019, **1081**, 184–192.
9. X. Zhong, Q. Yang, Y. Chen, Y. Jiang and Z. Dai, *J. Mater. Chem. B* 2020, DOI: 10.1039/d0tb01496f.
10. J. Lan, L. Liu, R. Zeng, Y. Qin, Y. Liu, X. Jiang, A. Aihemaiti, Y. Ding, T. Zhang and R. J. Y. Ho, *Chem. Commun.* 2020, **56**, 1219–1222.
11. W. Wang, J. Ning, J. Liu, J. Miao and B. Zhao, *Dyes Pigments* 2019, **177**, 107708.
